# Supplementary material for: Structural Isomerism and Enhanced Lipophilicity of Pyrithione Ligands of Organoruthenium(II) Complexes Increase Inhibition on AChE and BuChE
Source: PubMed Central journal article supplement (PMC7460603; doi:10.3390/ijms21165628), 2020-08-06
Supplement: ijms-21-05628-s001.pdf [file ijms-21-05628-s001.pdf]

# Structural Isomerism and Enhanced Lipophilicity of Pyrrithione Ligands of Organoruthenium(II) Complexes Increase Inhibition on AChE and BuChE

Jerneja Kladnik <sup>1</sup>, Samuel Ristovski <sup>2</sup>, Jakob Kljun <sup>1</sup>, Andrea Defant <sup>3</sup>, Ines Mancini <sup>3</sup>, Kristina Sepčič <sup>2,\*</sup> and Iztok Turel <sup>1,\*</sup>

<sup>1</sup> Faculty of Chemistry and Chemical Technology, University of Ljubljana, Večna pot 113, SI-1000 Ljubljana, Slovenia; [jerneja.kladnik@fkkt.uni-lj.si](mailto:jerneja.kladnik@fkkt.uni-lj.si) (J.Kla.), [jakob.kljun@fkkt.uni-lj.si](mailto:jakob.kljun@fkkt.uni-lj.si) (J.Klj.), [iztok.turel@fkkt.uni-lj.si](mailto:iztok.turel@fkkt.uni-lj.si) (I. T.)

<sup>2</sup> Department of Biology, Biotechnical Faculty, University of Ljubljana, Jamnikarjeva 101, 1000 Ljubljana, Slovenia; [samuel.ristovski@gmail.com](mailto:samuel.ristovski@gmail.com) (S.R.), [kristina.sepic@bf.uni-lj.si](mailto:kristina.sepic@bf.uni-lj.si) (K.S.)

<sup>3</sup> Department of Physics, Bioorganic Chemistry Laboratory, University of Trento, via Sommarive, 14 I-38123 Povo-Trento, Italy; [andrea.defant@unitn.it](mailto:andrea.defant@unitn.it) (A.D.), [ines.mancini@unitn.it](mailto:ines.mancini@unitn.it) (I.M.)

\* Correspondence: [kristina.sepic@bf.uni-lj.si](mailto:kristina.sepic@bf.uni-lj.si) (K.S.), [iztok.turel@fkkt.uni-lj.si](mailto:iztok.turel@fkkt.uni-lj.si) (I.T.)

## Table of Contents

|                                                                              |    |
|------------------------------------------------------------------------------|----|
| 1. Synthesis of the ligands <b>f-h</b> and their complexes <b>1f-h</b> ..... | 2  |
| 2. Single crystal X-ray diffraction.....                                     | 3  |
| 3. NMR stability.....                                                        | 5  |
| 4. NMR spectra.....                                                          | 8  |
| 5. IR spectra.....                                                           | 17 |
| 6. Additional computational data.....                                        | 20 |
| 7. ADME prediction data.....                                                 | 21 |

1. Synthesis of the ligands f-h and their complexes 1f-h.

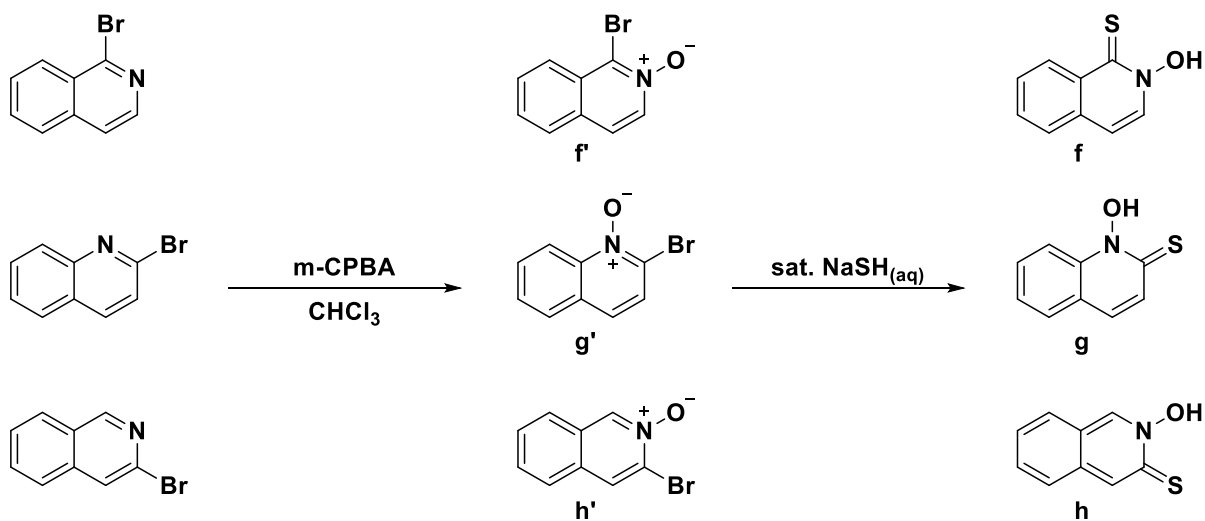

**Scheme S1.** General scheme of N-oxidation and thiolation for the ligands f-h.

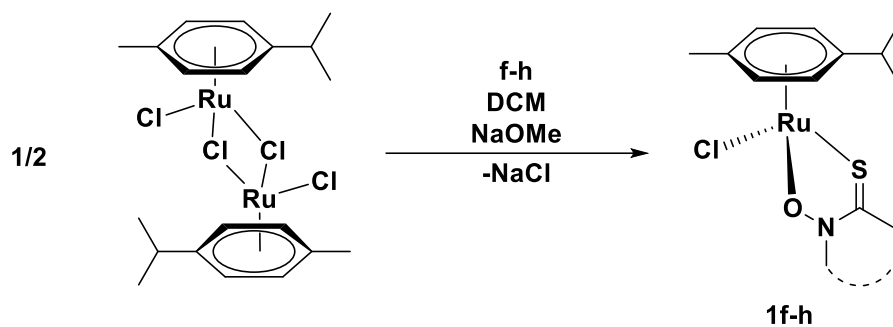

**Scheme S2.** General scheme of the synthesis for the organoruthenium(II) complexes 1f-h.

## 2. Single crystal X-ray diffraction.

**Table S1.** Crystallographic data for the compounds **1f**, and **1g**.

| Compound                                   | <b>1f</b>                                                        | <b>1g</b>                                                        |
|--------------------------------------------|------------------------------------------------------------------|------------------------------------------------------------------|
| Empirical formula                          | C <sub>19</sub> H <sub>20</sub> CINORuS                          | C <sub>19</sub> H <sub>20</sub> CINORuS                          |
| Formula weight                             | 446.94                                                           | 446.94                                                           |
| Temperature/K                              | 150.00(10)                                                       | 150.00(10)                                                       |
| Crystal system                             | triclinic                                                        | monoclinic                                                       |
| Space group                                | P-1                                                              | P2 <sub>1</sub> /n                                               |
| a/Å                                        | 9.3454(4)                                                        | 12.1593(6)                                                       |
| b/Å                                        | 9.7451(5)                                                        | 10.8164(6)                                                       |
| c/Å                                        | 10.3401(5)                                                       | 14.5652(7)                                                       |
| α/°                                        | 91.210(4)                                                        | 90                                                               |
| β/°                                        | 102.660(4)                                                       | 97.892(5)                                                        |
| γ/°                                        | 101.940(4)                                                       | 90                                                               |
| Volume/Å <sup>3</sup>                      | 896.74(8)                                                        | 1897.47(17)                                                      |
| Z                                          | 2                                                                | 4                                                                |
| ρ <sub>calc</sub> /cm <sup>3</sup>         | 1.655                                                            | 1.565                                                            |
| μ/mm <sup>-1</sup>                         | 1.145                                                            | 1.082                                                            |
| F(000)                                     | 452.0                                                            | 904.0                                                            |
| Crystal size/mm <sup>3</sup>               | 0.15 × 0.1 × 0.1                                                 | 0.10 × 0.05 × 0.05                                               |
| Radiation                                  | MoKα (λ = 0.71073)                                               | MoKα (λ = 0.71073)                                               |
| 2θ range for data coll./°                  | 5.548 to 54.968                                                  | 5.566 to 54.96                                                   |
| Index ranges                               | -12 ≤ h ≤ 12,<br>-12 ≤ k ≤ 12,<br>-11 ≤ l ≤ 13                   | -15 ≤ h ≤ 15,<br>-13 ≤ k ≤ 14,<br>-18 ≤ l ≤ 18                   |
| Reflections collected                      | 7902                                                             | 11118                                                            |
| Independent reflections                    | 4112 [R <sub>int</sub> = 0.0310,<br>R <sub>sigma</sub> = 0.0484] | 4336 [R <sub>int</sub> = 0.0825,<br>R <sub>sigma</sub> = 0.0788] |
| Data/restraints/parameters                 | 4112/0/220                                                       | 4336/0/220                                                       |
| Goodness-of-fit on F <sup>2</sup>          | 1.047                                                            | 1.060                                                            |
| Final R indexes [I ≥ 2σ (I)]               | R <sub>1</sub> = 0.0321,<br>wR <sub>2</sub> = 0.0661             | R <sub>1</sub> = 0.0646,<br>wR <sub>2</sub> = 0.1604             |
| Final R indexes [all data]                 | R <sub>1</sub> = 0.0414,<br>wR <sub>2</sub> = 0.0710             | R <sub>1</sub> = 0.0855,<br>wR <sub>2</sub> = 0.1881             |
| Largest diff. peak/hole / eÅ <sup>-3</sup> | 0.66/-0.59                                                       | 1.92/-1.65                                                       |

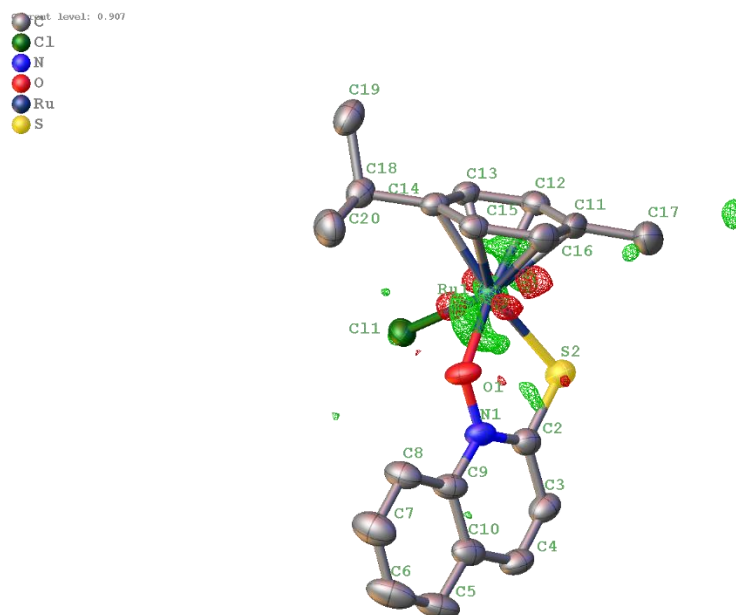

**Figure S1.** Residual electron density around the ruthenium atom. Red colour denotes peaks, green colour denotes holes.

Comment to the checkcif report. The checkcif report to the crystal structure of compound **1g** presents several alerts arising from issues of X-ray absorption and not ideal crystal quality. All bond lengths and angles as well as thermal ellipsoid parameters are within normal range for organoruthenium complexes. At present this structure is the best we were able to obtain.

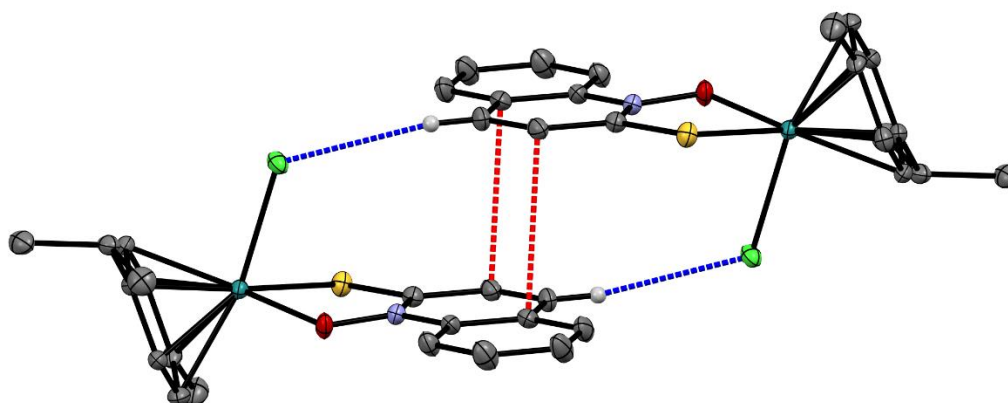

**Figure S2:** Crystal packing in the compound **1g**. The molecules of the compound **1g** form dimers in solid state. The blue dashed line represents a weak C(Ar)-H...Cl hydrogen bond, the red dashed line shows  $\pi$ -stacking interactions. Thermal ellipsoids are drawn at 20% probability level, H atoms not involved in intramolecular interactions are omitted for better clarity of presentation.

### 3. NMR stability

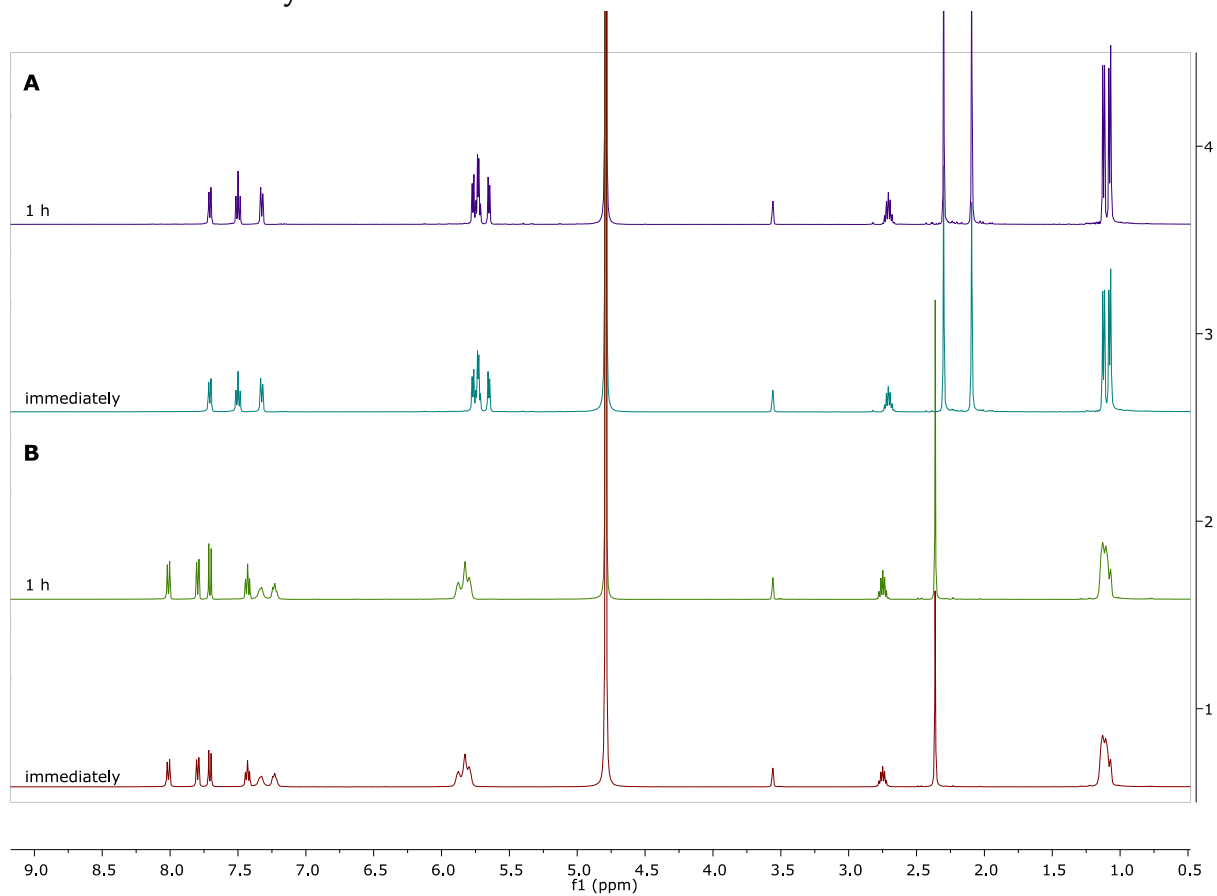

**Figure S3:** Selected spectra of the chlorido complex **1e** (A) and **1g** (B) in 6.25% EtOH- $d_6$ /D $_2$ O containing 80.2 mM K $_2$ HPO $_4$  and 19.8 mM KH $_2$ PO $_4$ , followed by  $^1$ H NMR spectroscopy immediately after the dilution of the samples and after 1h.

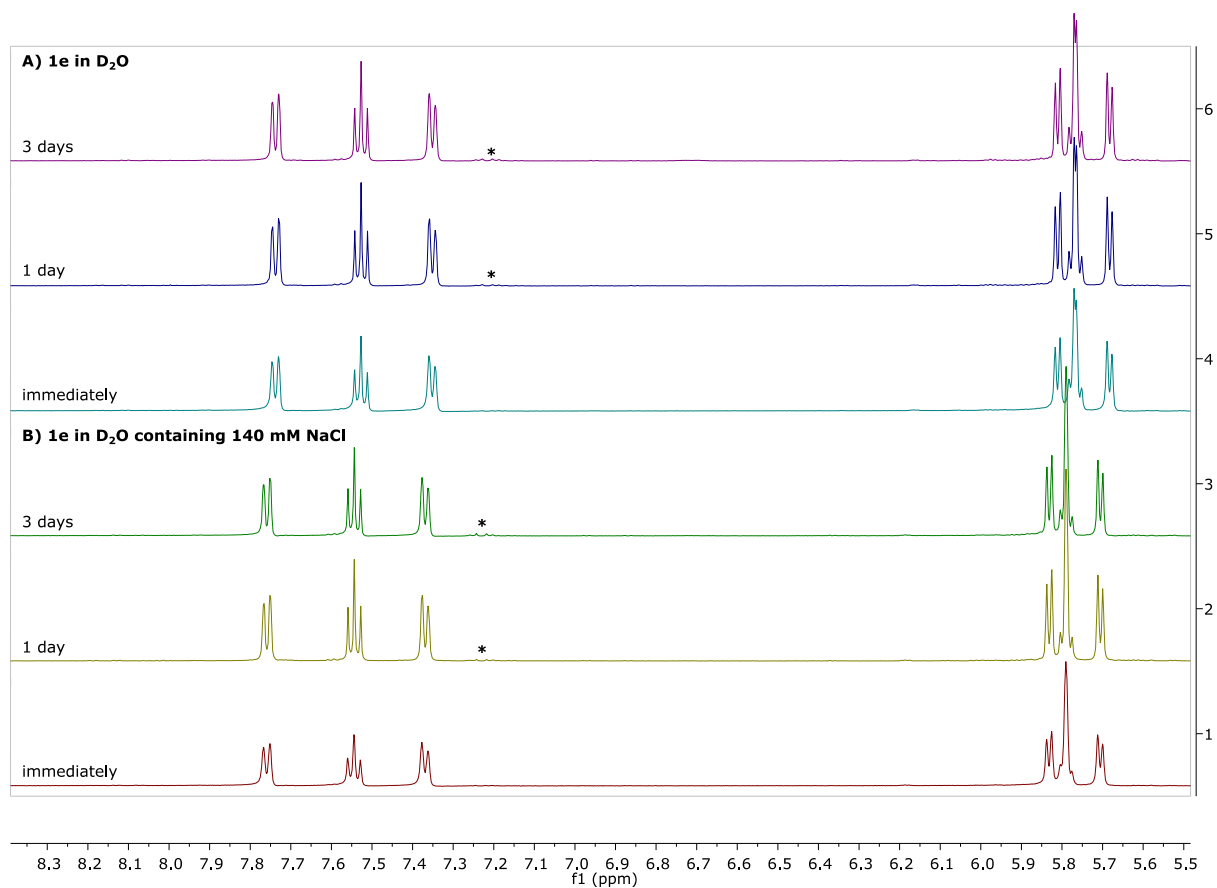

**Figure S4:** Selected spectra of the chlorido complex **1e** in D<sub>2</sub>O (**A**) or in D<sub>2</sub>O containing 140 mM NaCl (**B**), followed by <sup>1</sup>H NMR spectroscopy immediately after the dilution, after one and three days. The release of *p*-cymene is labelled with an asterisk (\*).

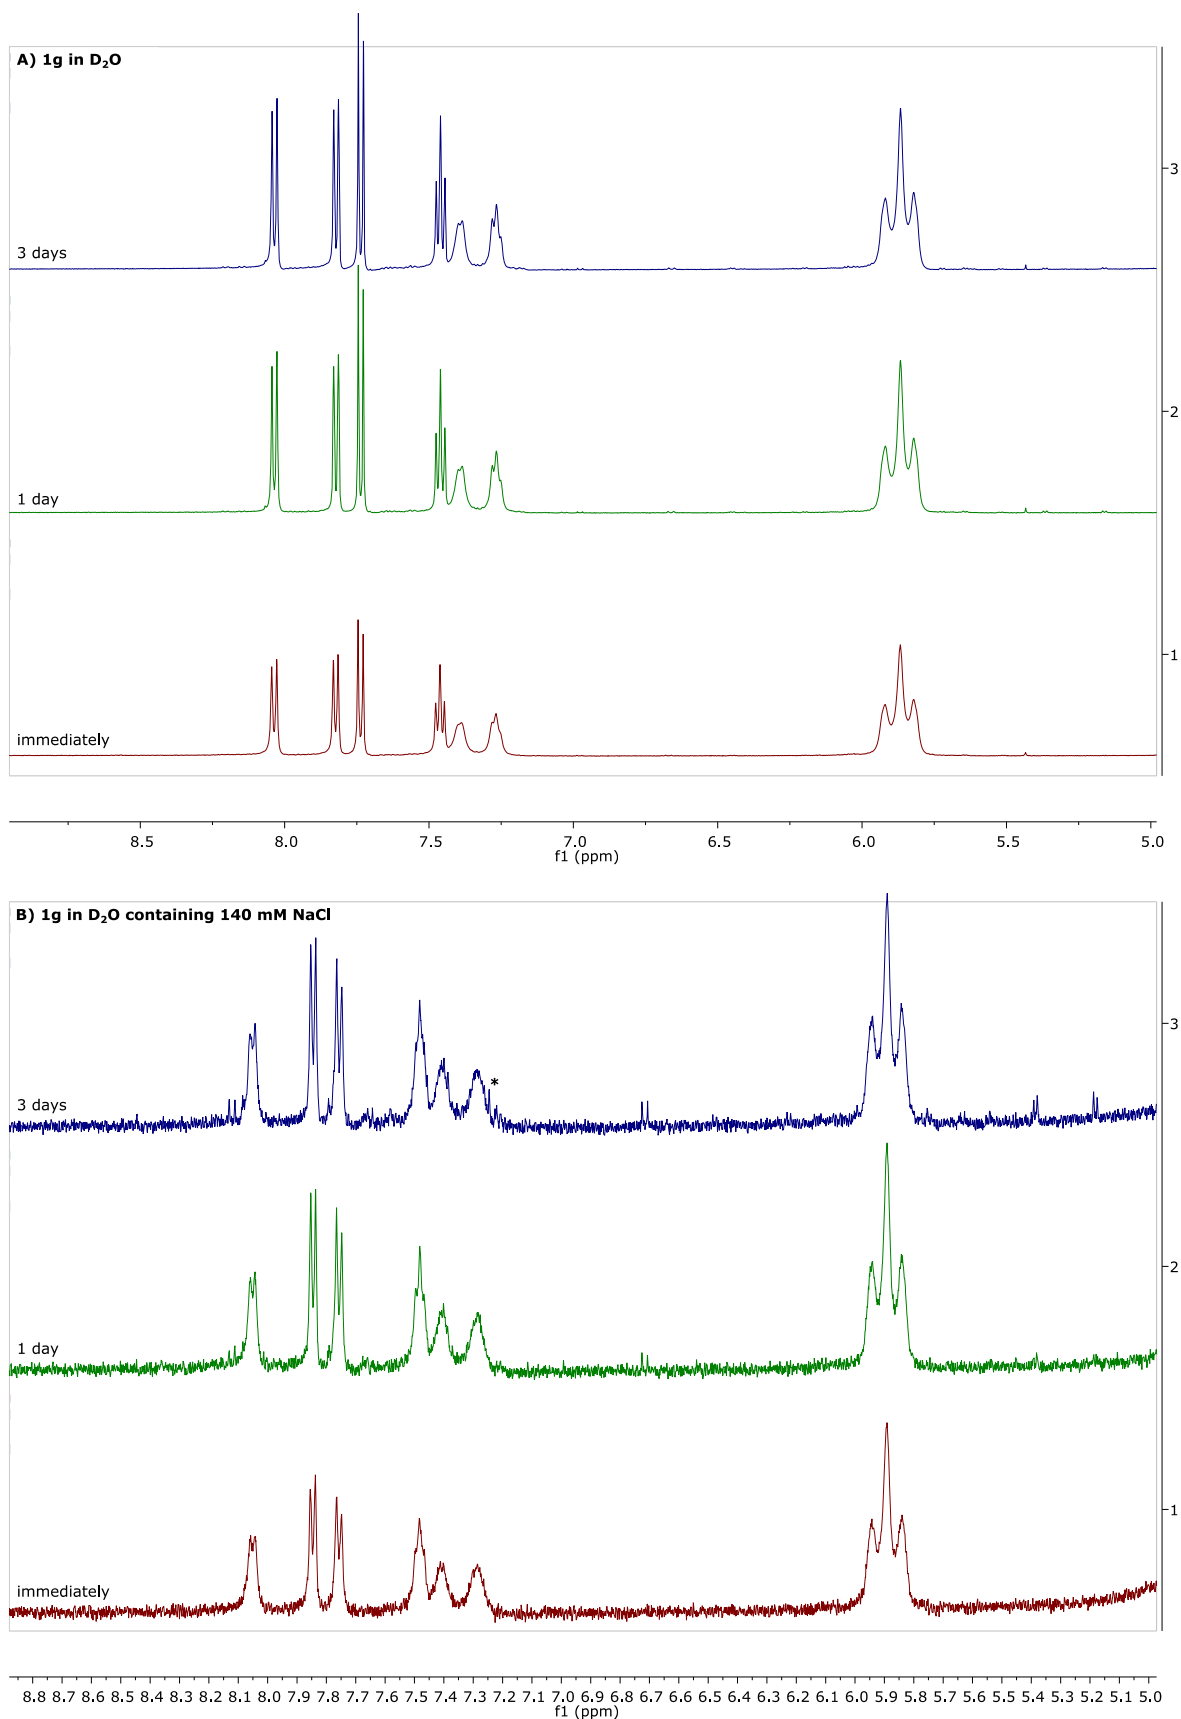

**Figure S5:** Selected spectra of the chlorido complex **1g** in D<sub>2</sub>O (**A**) or in D<sub>2</sub>O containing 140 mM NaCl (**B**), followed by <sup>1</sup>H NMR spectroscopy immediately after the dilution, after one and three days. The release of *p*-cymene is labelled with an asterisk (\*).

#### 4. NMR spectra

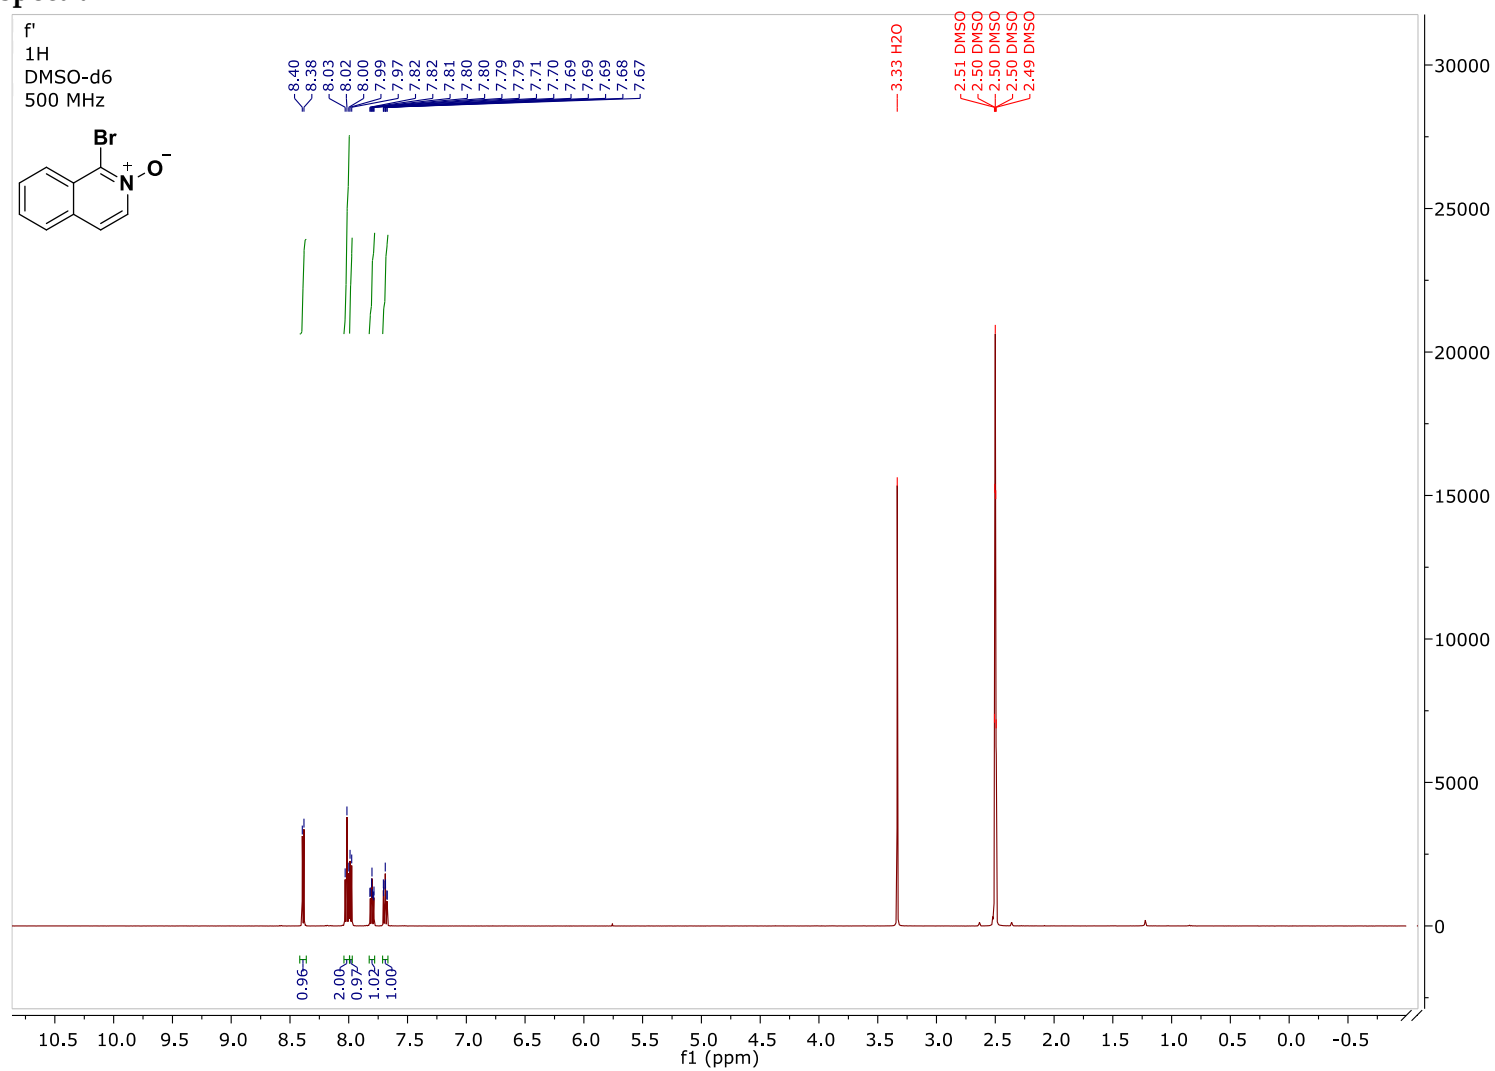

Figure S6:  $^1\text{H}$  NMR spectrum of **f'**.



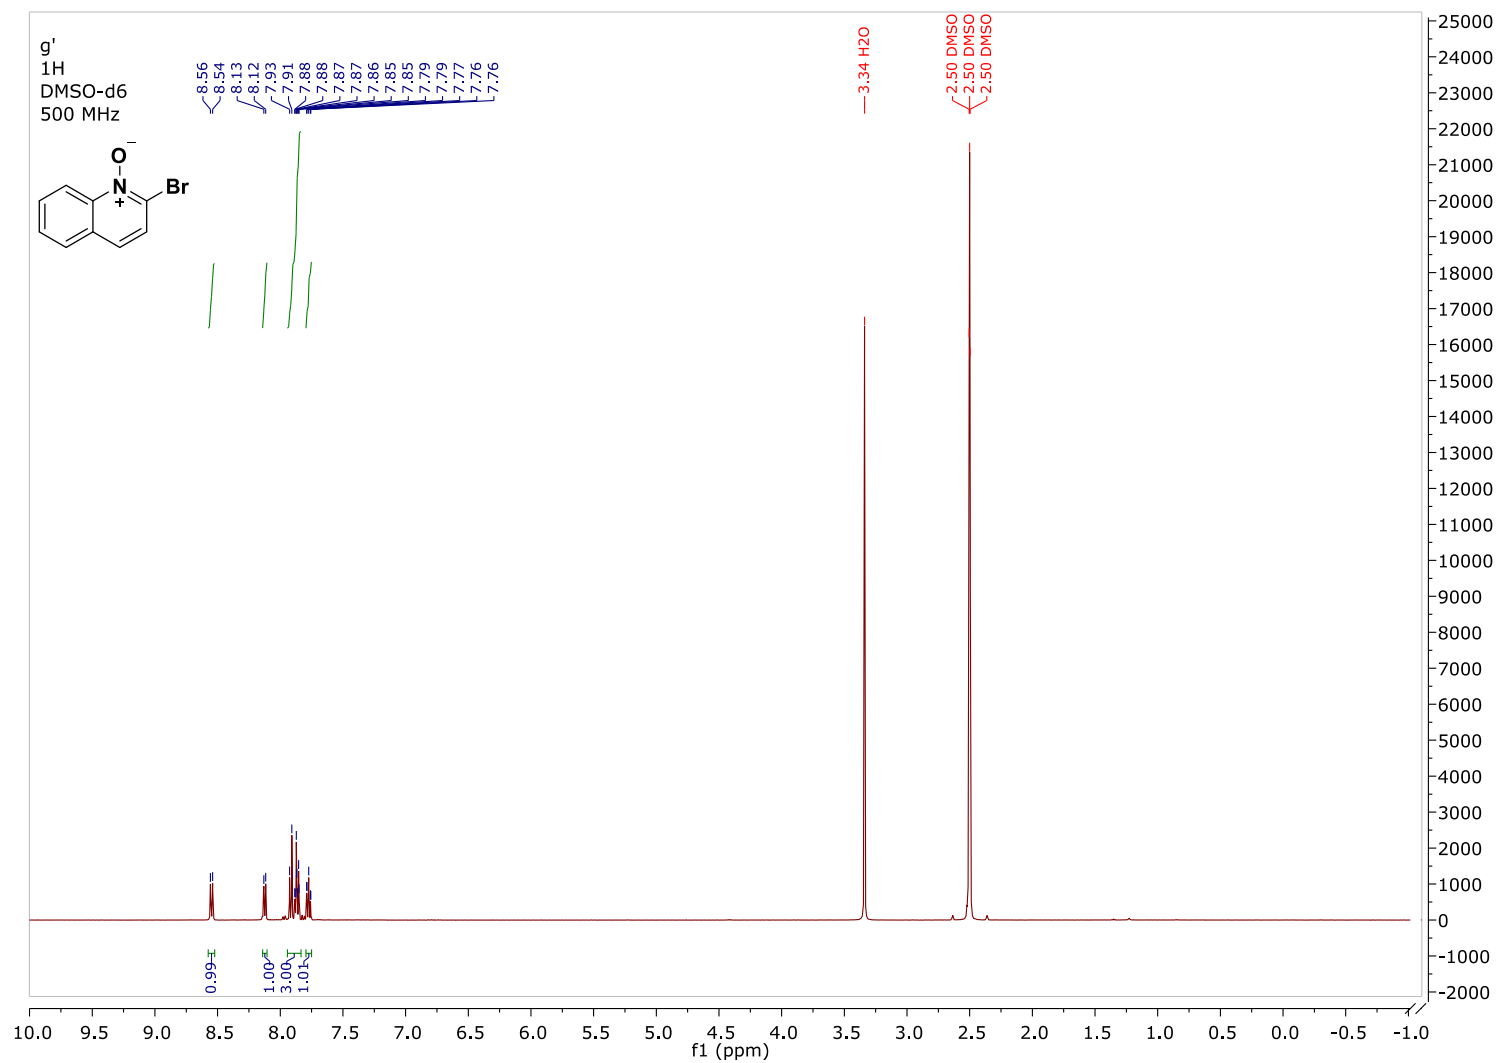

Figure S7:  $^1\text{H}$  NMR spectrum of g'.

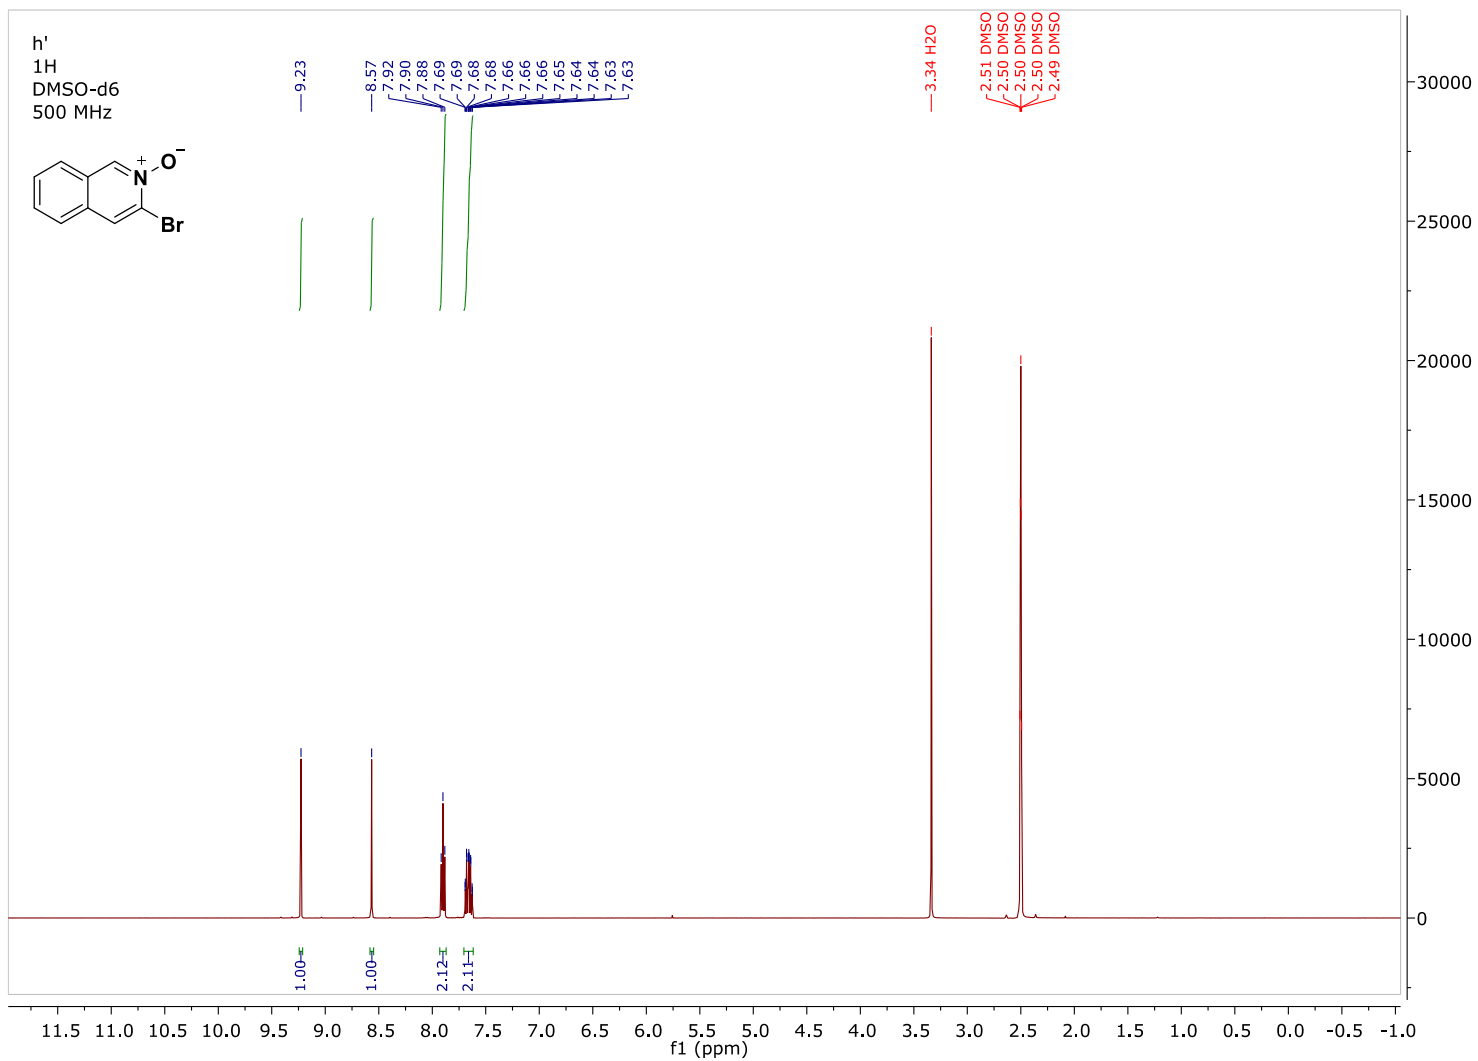

Figure S8: <sup>1</sup>H NMR spectrum of h'.

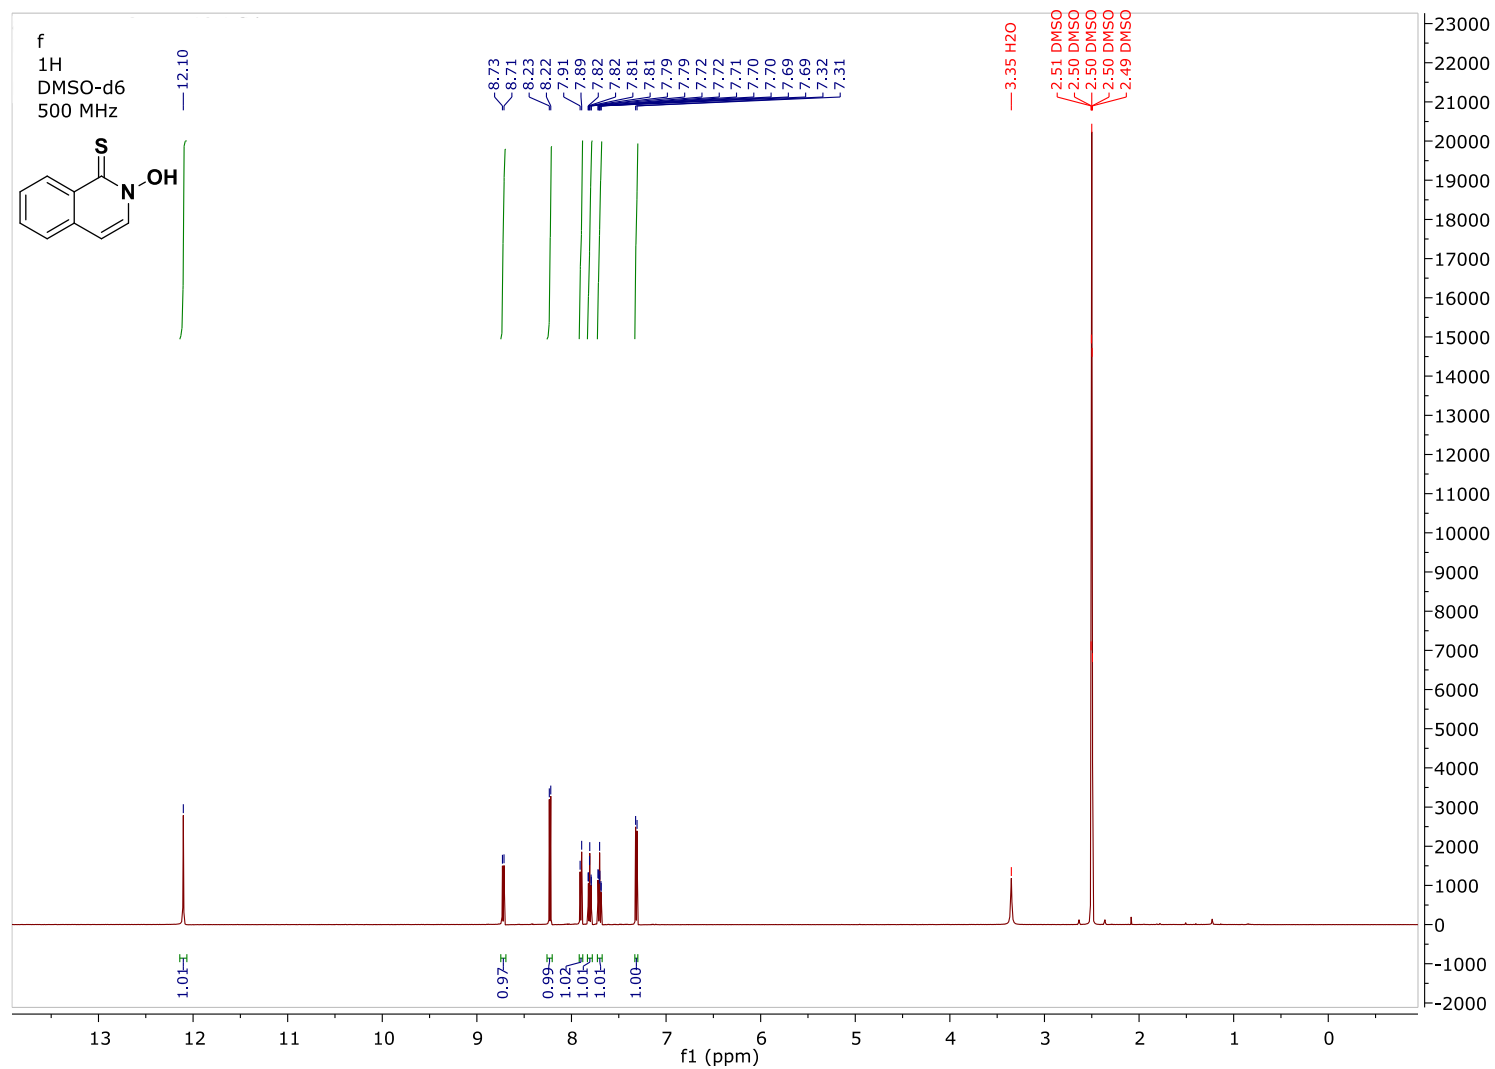

Figure S9: <sup>1</sup>H NMR spectrum of **f**.

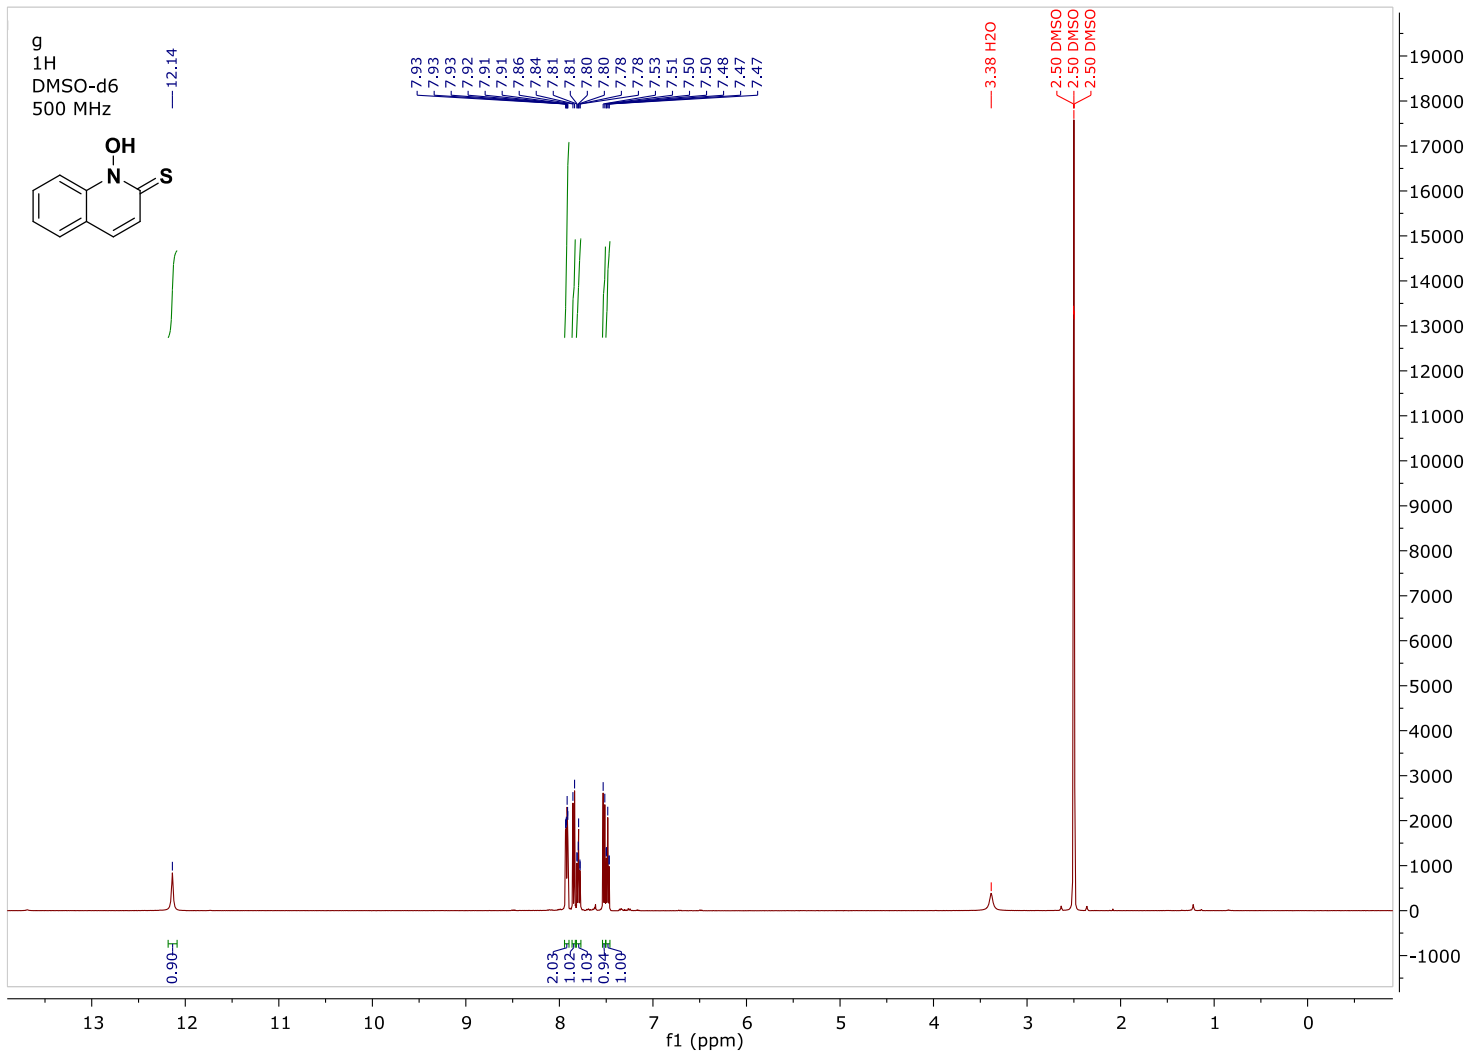

Figure S10: <sup>1</sup>H NMR spectrum of g.

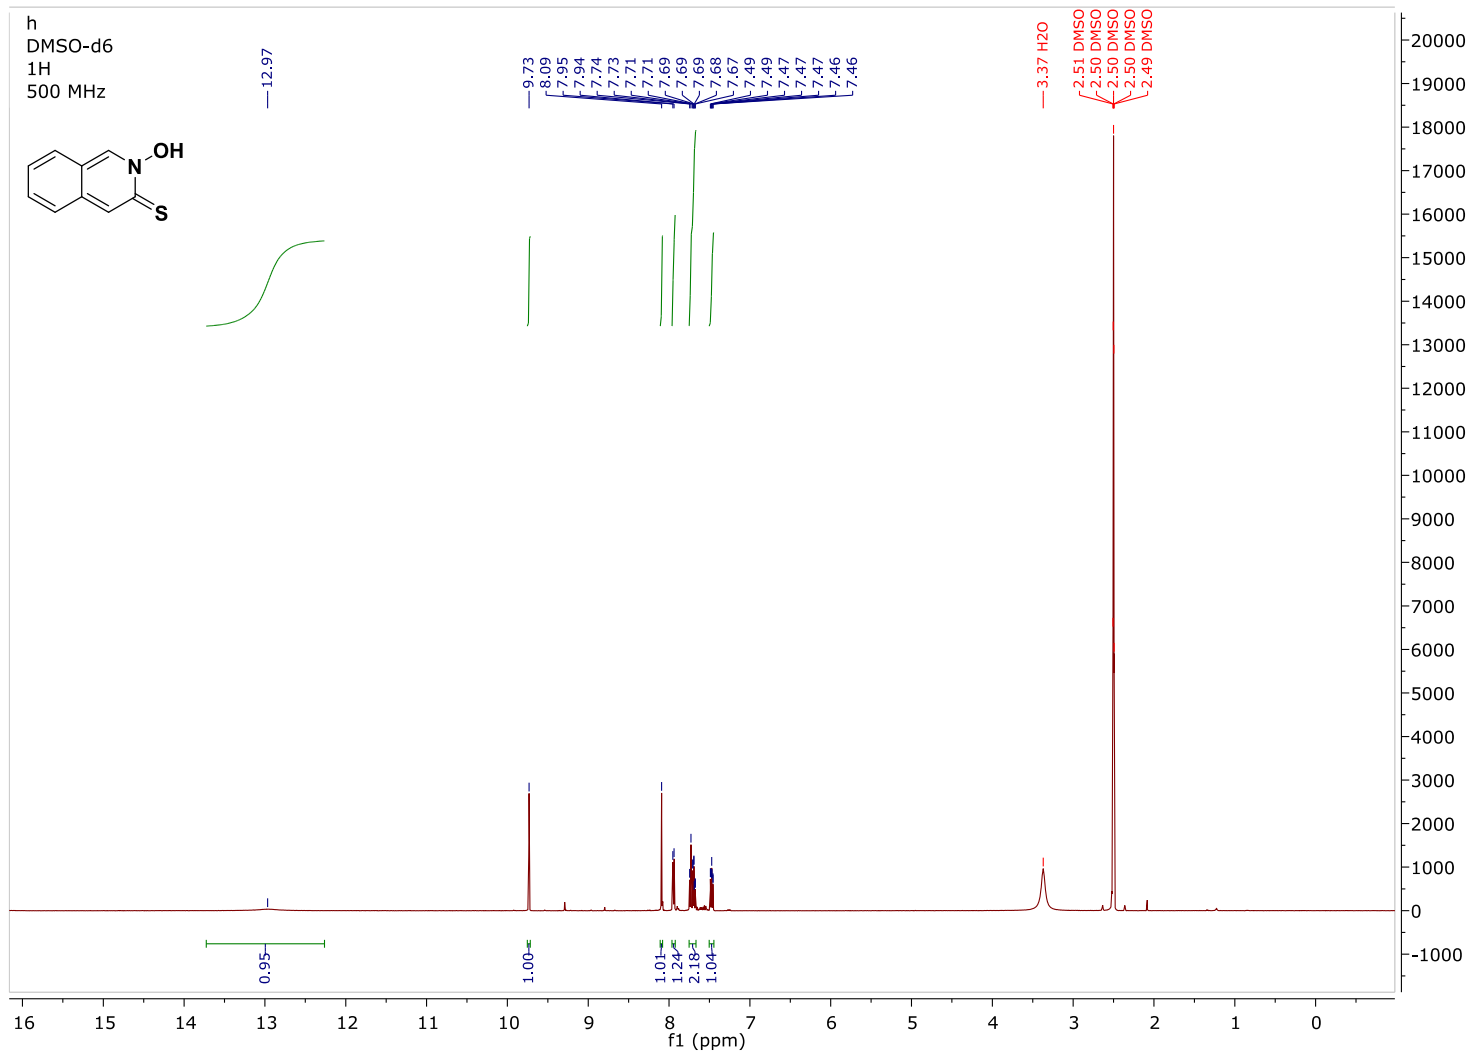

Figure S11:  $^1\text{H}$  NMR spectrum of **h**.

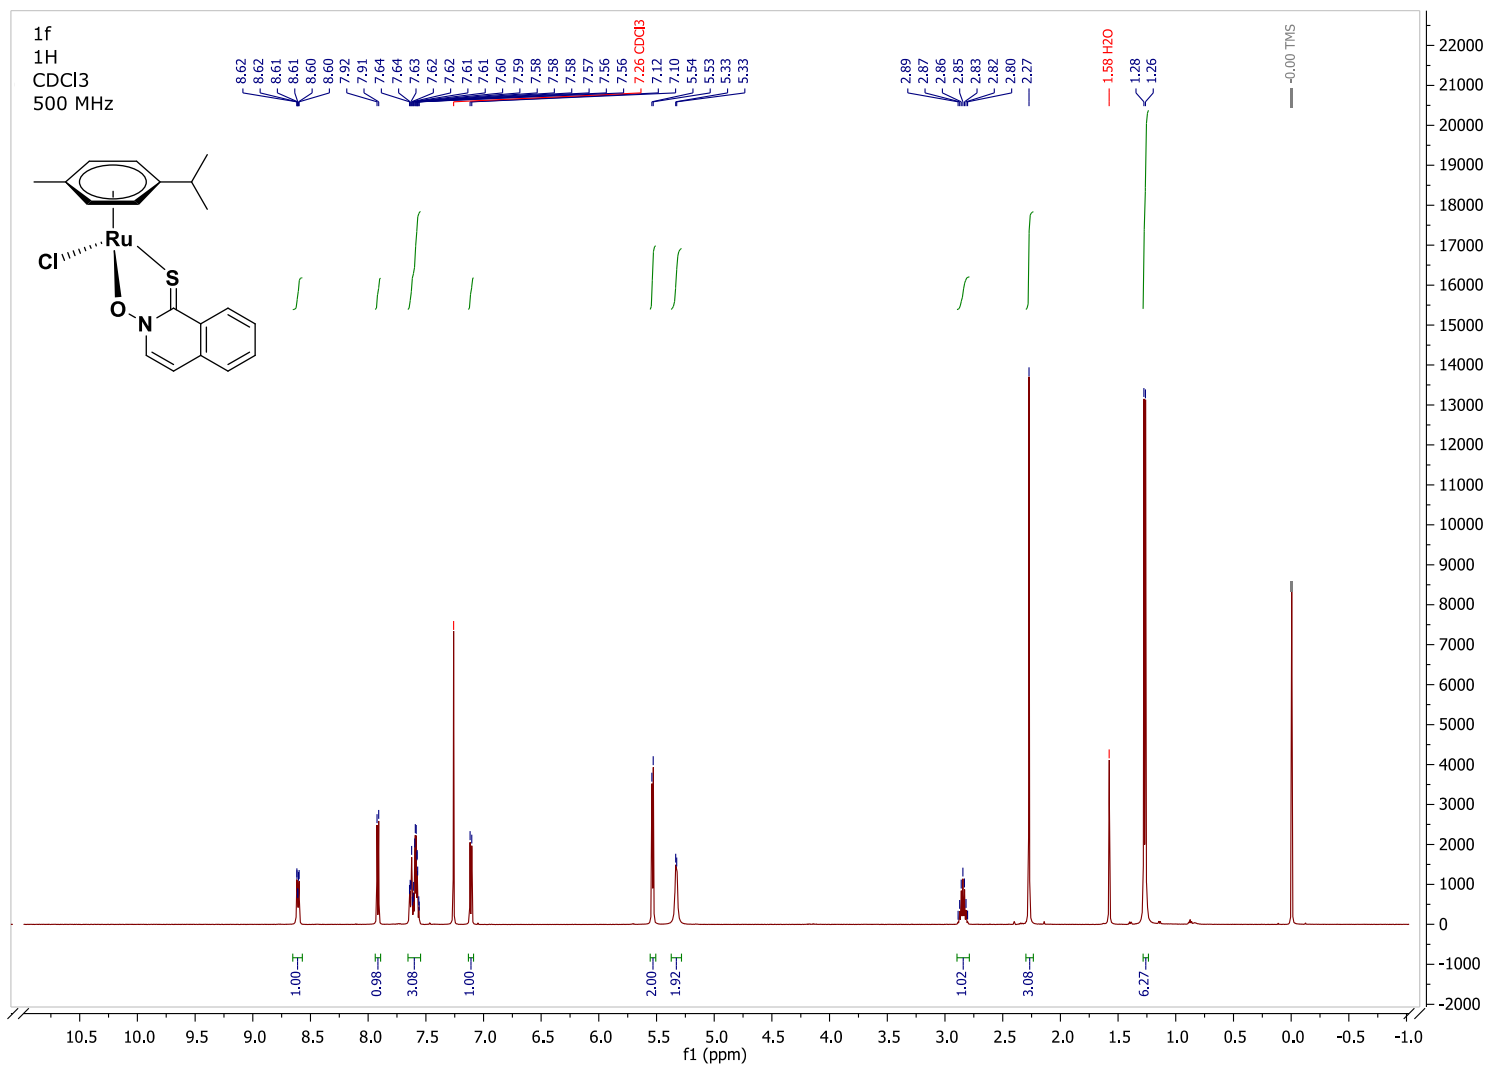

Figure S12: <sup>1</sup>H NMR spectrum of 1f.

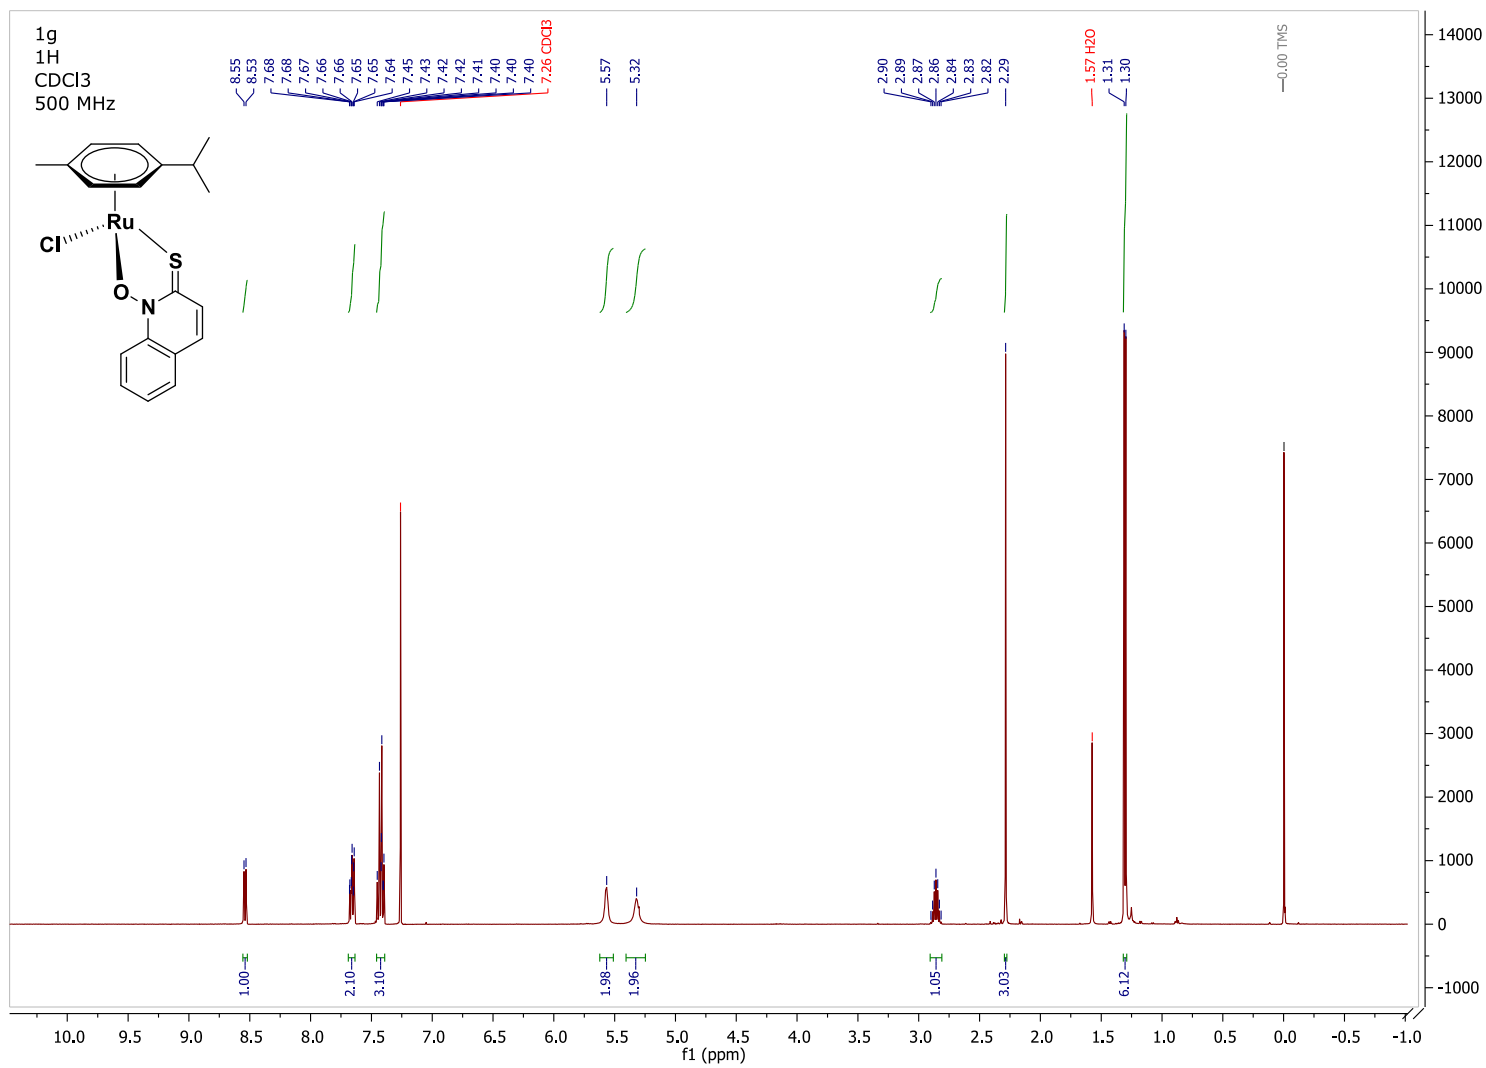

Figure S13: <sup>1</sup>H NMR spectrum of 1g.

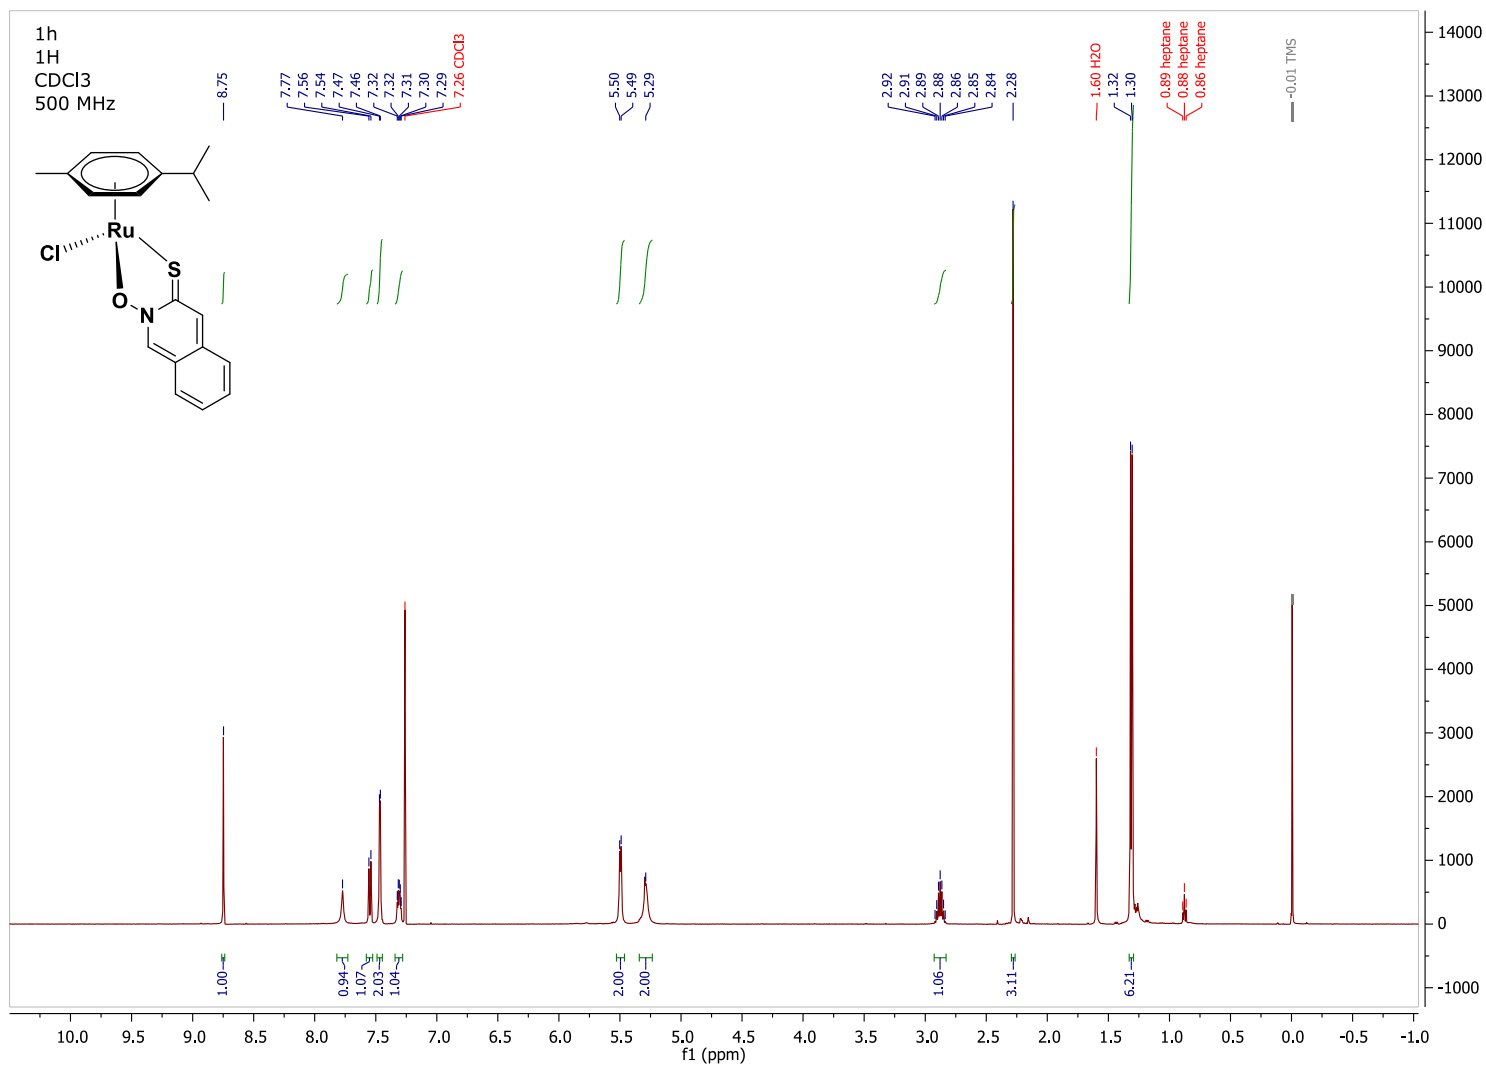

Figure S14:  $^1\text{H}$  NMR spectrum of **1h**.



## 5. IR spectra

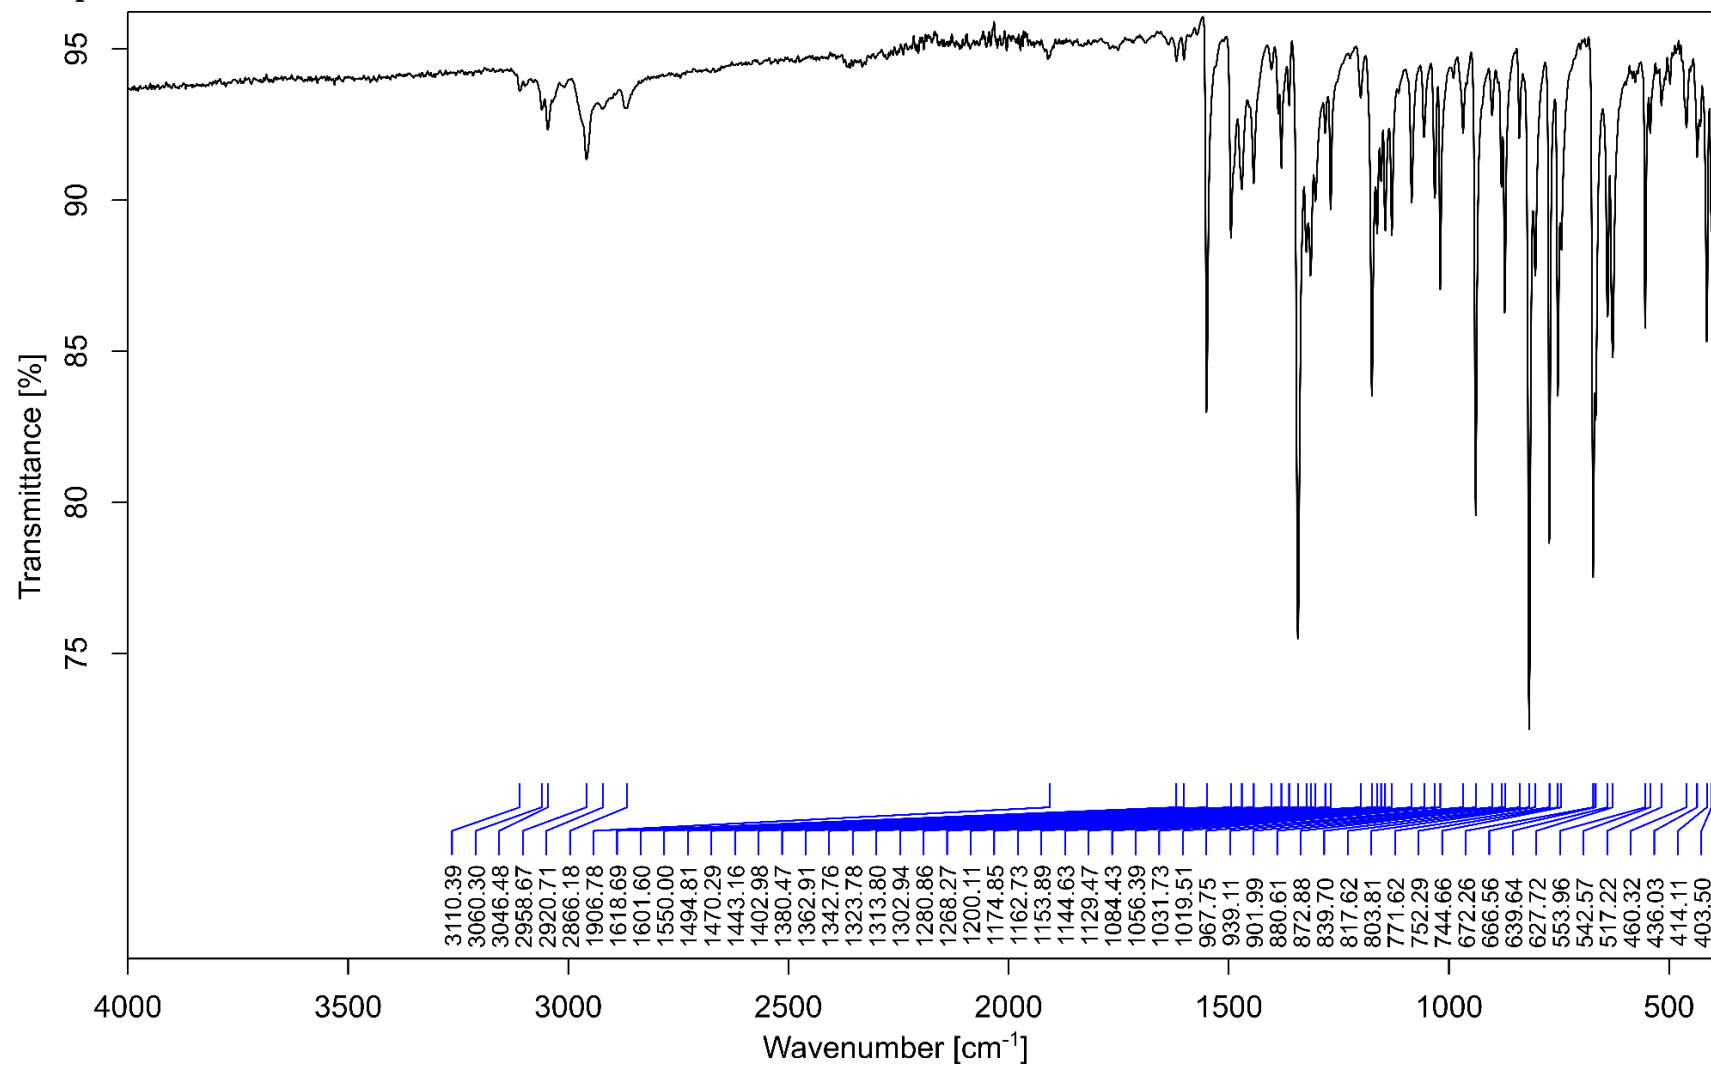

Figure S15: IR spectrum of 1f.

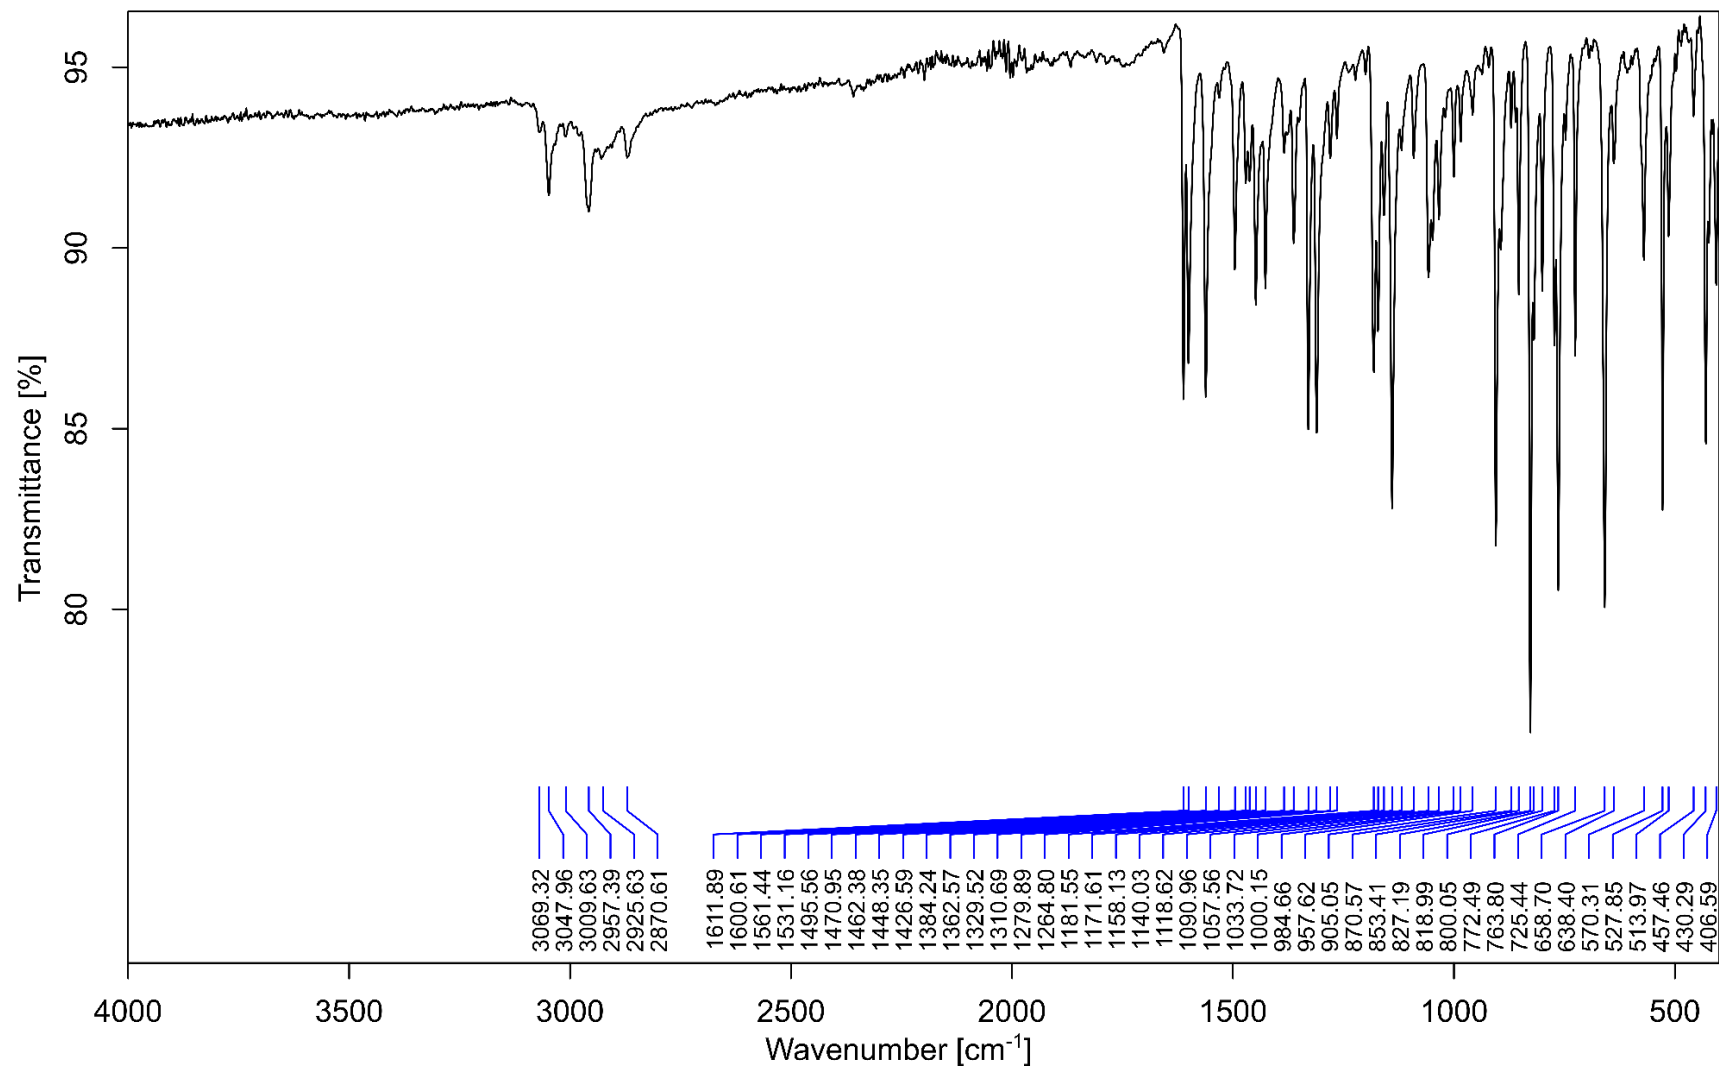

Figure S16: IR spectrum of 1g.

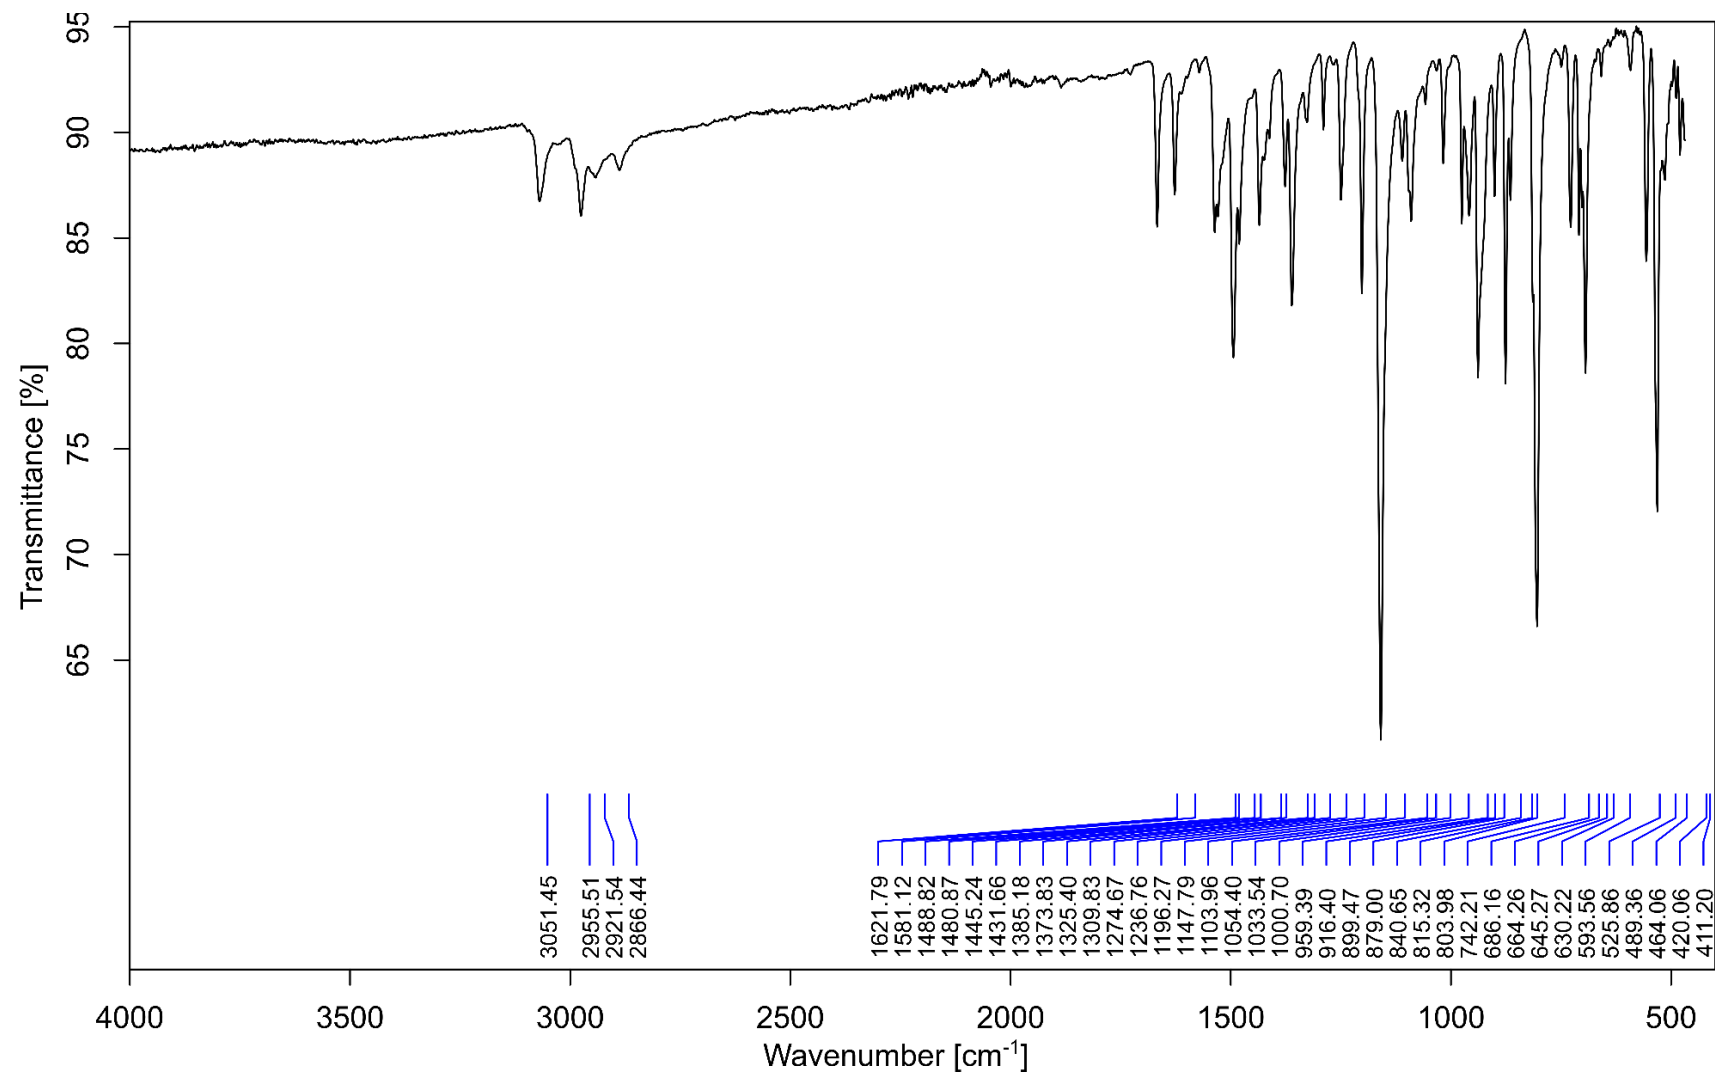

Figure S17: IR spectrum of **1h**.



## 7. ADME prediction data

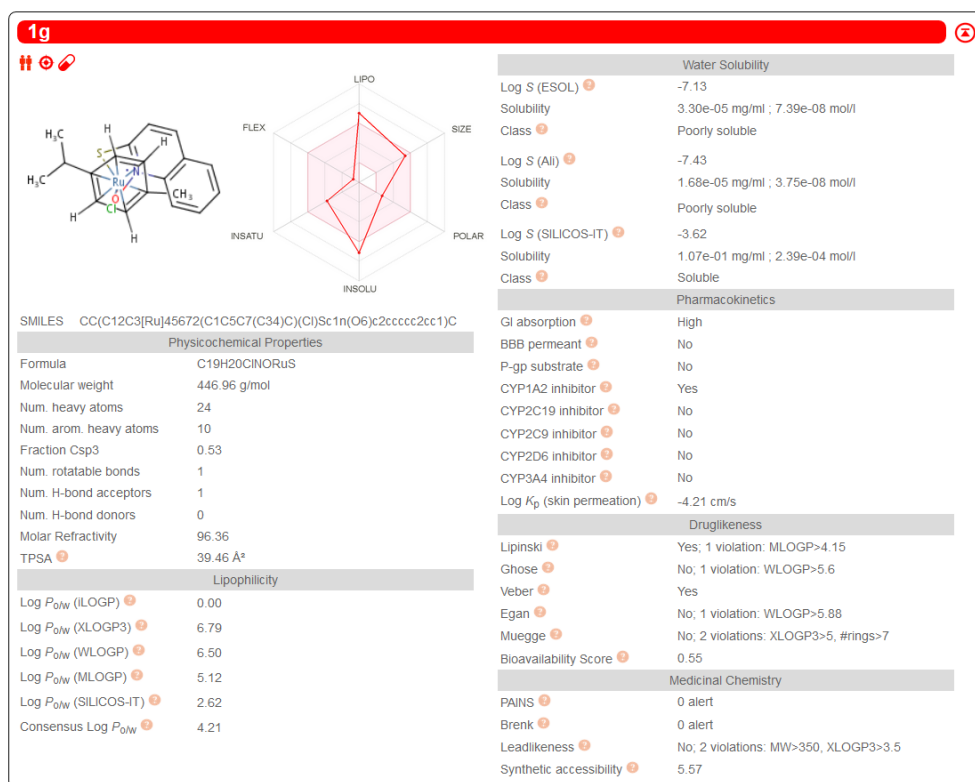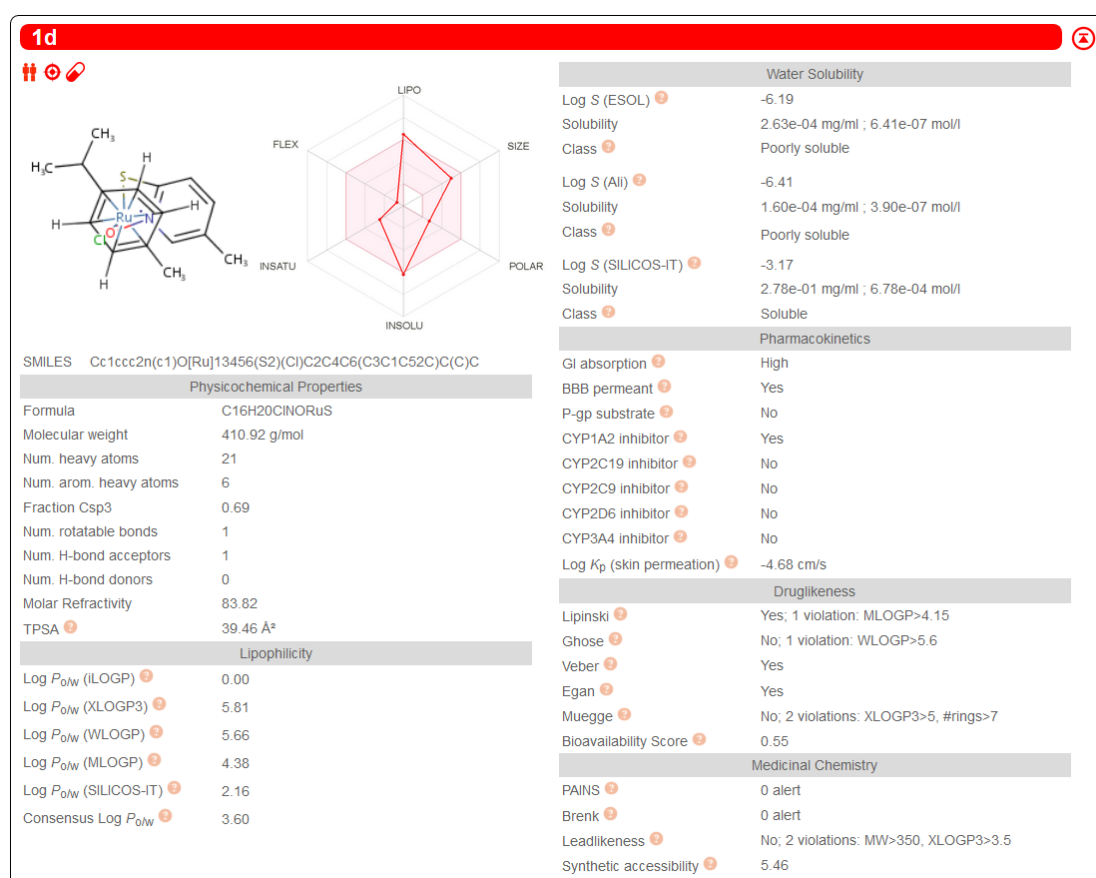

**Figure S19.** ADME Prediction of compounds **1g** and **1d** evaluated by online Server Swiss-ADME.
